# Supplementary material
Source: PubMed Central journal article supplement (PMC5586143)
Supplement: NIHMS894534-supplement-Supporting_Information_Legend.pdf [file NIHMS894534-supplement-Supporting_Information_Legend.pdf]

## SUPPORTING INFORMATION

# Multiplexed Sequence-Specific Capture of Chromatin and Mass Spectrometric Discovery of Associated Proteins

Yunxiang Dai<sup>1</sup>, Julia Kennedy-Darling<sup>1</sup>, Michael R. Shortreed<sup>1</sup>,  
Mark Scalf<sup>1</sup>, Audrey P. Gasch<sup>2</sup>, and Lloyd M. Smith<sup>1,3\*</sup>

<sup>1</sup>Department of Chemistry, University of Wisconsin, Madison, Wisconsin, United States

<sup>2</sup>Laboratory of Genetics, University of Wisconsin, Wisconsin, United States

<sup>3</sup>Genome Center of Wisconsin, University of Wisconsin, Madison, Wisconsin, United States

\*Corresponding Author

### Table of Contents:

|                                                                                                                      |                                                      |
|----------------------------------------------------------------------------------------------------------------------|------------------------------------------------------|
| Table S-1, 2:                                                                                                        | Capture and Release Oligonucleotide Sequences        |
| Table S-3:                                                                                                           | qPCR Probe Sequences                                 |
| Supplementary Experimental Methods (TCA Precipitation, eFASP, C-18 Solid-Phase Extraction,<br>MaxQuant, and Perseus) |                                                      |
| Raw Data Files                                                                                                       |                                                      |
| Figure S-1:                                                                                                          | Targeted Genomic Sites                               |
| Figure S-2, 3:                                                                                                       | Capture Efficiency and Specificity                   |
| Figure S-4:                                                                                                          | Enriched Proteins from Perseus Analysis              |
| Table S-4, 5:                                                                                                        | Enriched Proteins from Percentile-Rank Analysis      |
| Table S-6:                                                                                                           | Complete List of Identified Proteins (in Excel)      |
| Figure S-5:                                                                                                          | Alternatively Arranged Heat Map of Enriched Proteins |

**SI Table S-1.** Capture Oligonucleotide Sequences. The 5' ends are biotinylated. Red indicates toehold sequences that do not hybridize with targets.

| Gene target  | Capture Oligonucleotides Sequence (5'-3')       |
|--------------|-------------------------------------------------|
| 25S rDNA     | <b>GTTTACCCG</b> CTGAACTTAAGCATATCAATAAGCGGAGGA |
| <i>ARX1</i>  | <b>CCCAGGTT</b> AAATATTCTACAGGAATCGGTCTTGAACAA  |
|              | <b>CCCAGGTT</b> TCTGGTGGATGGTGCCCCGAAATAGATGAT  |
|              | <b>CCCAGGTT</b> CTGGCAGGCCAAAACGAAGGTATTGTTGCC  |
|              | <b>CCCAGGTT</b> TAGTAACTTTAGAAACCGTTGACTCTTACA  |
|              | <b>CCCAGGTT</b> GCTCGTGAATGTAATACCATCGTATTATGT  |
| <i>CTT1</i>  | <b>AGTGTCAC</b> GACCAGACGGCCCTATCTTACTGCAAGACT  |
|              | <b>AGTGTCAC</b> GGGTCTTCAACAATACTCCCGTCTTCTTCC  |
|              | <b>AGTGTCAC</b> CCTTTGAGAAAATTTGGTACCATCACCTTA  |
|              | <b>AGTGTCAC</b> GGCCAATGAGTTACTACAATTTTCGGTCTT  |
|              | <b>AGTGTCAC</b> TTATTCATAATTATTCGTAATTATATCTCC  |
| <i>RPL30</i> | <b>TAACCAGG</b> CGGAGTGTTTAAGAACCTACAGCTTATTCA  |
|              | <b>TAACCAGG</b> GATTAGCAAGAAGGCTTGAATACAAACAT   |
|              | <b>TAACCAGG</b> AGAATCTATCAACCAAAGTTGGCTTTGGT   |
|              | <b>TAACCAGG</b> TTGATCATCATTGCCGCTAACACTCCAGTT  |
|              | <b>TAACCAGG</b> ACAACGAATTGGGTACTGCTGTCGGTAAGT  |

**SI Table S-2.** Release Oligonucleotide Sequences. Green indicates toehold sequences complementary to their capture toehold counterparts.

| Gene target  | Release Oligonucleotides Sequence (5'-3')              |
|--------------|--------------------------------------------------------|
| 25S rDNA     | TCCTCCGCTTATTGATATGCTTAAGTTCAG <b>CGGGTAAAC</b>        |
| <i>ARX1</i>  | TTGTTCAAGACCGATTCCCTGTAGAATATTT <b>AACCTGGG</b>        |
|              | ATCATCTATTT <b>CGGGC</b> ACCATCCACCAGAA <b>ACCTGGG</b> |
|              | GGCAACAATACCTTCGTTTTGGCCTGCCAGAA <b>ACCTGGG</b>        |
|              | TGTAAGAGTCAACGGTTTCTAAAGTTACTAA <b>ACCTGGG</b>         |
|              | ACATAATACGATGGTATTACATTCACGAGCAA <b>ACCTGGG</b>        |
| <i>CTT1</i>  | AGTCTTG <b>CAGTA</b> AAGATAGGGCCGTCTGGT <b>CGTGACT</b> |
|              | AGGAAGAAGACGGGAGTATTGTTGAAGAC <b>CCGTGACT</b>          |
|              | TAGGGTGATGGTACCAAATTTTCTCAAAG <b>GGTGACT</b>           |
|              | AGGACCGAAATTGTAGTAACTCATTGGG <b>CCGTGACT</b>           |
|              | GGAGATATAATTACGAATAATTATGAATAA <b>GTGACT</b>           |
| <i>RPL30</i> | TGAATAAGCTGTAGGTTCTTAAACACTCCG <b>CCTGGTTA</b>         |
|              | ATGTTTGTATTCCAAGCCTTCTTGCTAAT <b>CCCTGGTTA</b>         |
|              | ACCAAAGCCAACTTTTGGTTGATAGATTCT <b>CCTGGTTA</b>         |
|              | AACTGGAGTGTTAGCGGCAATGATGATCA <b>ACCTGGTTA</b>         |
|              | ACTTACCGACAGCAGTACCCAATTCGTTG <b>TCCTGGTTA</b>         |

**SI Table S-3. Primer and Probe Design of the 4 qPCR Assays.**

| qPCR Assays  | Position | Sequence (5'-3')           |
|--------------|----------|----------------------------|
| 25S rDNA     | Forward  | TTAGTAACGGCGAGTGAAGC       |
|              | Reverse  | CAAAGTTGCCCTCTCCAAAT       |
|              | Probe    | TCTGGTACCTTCGGTGCCCGA      |
| <i>ARX1</i>  | Forward  | TGCCGAAAGGGAATATAAGG       |
|              | Reverse  | CCACTGTAAATCCTTGGCA        |
|              | Probe    | TTGGACAGAGTCCCATCAAGAAGCA  |
| <i>CTT1</i>  | Forward  | CCATCACCTAACGGAGAAT        |
|              | Reverse  | TGGCTGTAGAACGGAATCA        |
|              | Probe    | TGAACAAGTTGCATTCAGTCCAACGA |
| <i>RPL30</i> | Forward  | TTCCTGCTCTTGTGTTTGAGA      |
|              | Reverse  | GCCTGTTGAAATGTAAACGATAA    |
|              | Probe    | CCGTTCAAAGGATGCTTCTCCATGA  |

## SUPPLEMENTARY EXPERIMENTAL METHODS.

A video tutorial of the main HyCCAPP procedure, from cell lysis to target release, is available on the YouTube platform ([https://youtu.be/vN\\_jHLInSlk](https://youtu.be/vN_jHLInSlk)), or search “HyCCAPP Tutorial”.

### TCA Precipitation.

A volume of 320  $\mu\text{L}$  100% trichloroacetic acid (TCA) was added to one of each of the four released samples and the uncaptured lysate control. The samples were gently mixed, incubated on ice for 10 min, and centrifuged at 20,000 g at 4 °C for 20 min. The resulting supernatants were decanted from the pellets. During centrifugation, the second tubes of each samples and lysate were TCA precipitated as previously described and added to the pellet in the first tubes. This serial addition of each TCA precipitated release sample was repeated for all four tubes of each sample. TCA pellets were washed twice with 750  $\mu\text{L}$  chilled acetone and centrifuged at 20,000 g at 4 °C for 5 min. Pellets were heated at 95 °C for 2 min to remove the residual acetone.

### eFASP Procedure.

Filter units and eFASP (*J. Proteome Res.* 2014, 13, 1885-1895) collection tubes were passivated by soaking in 5% Tween 20 overnight. Filter units and collection tubes were rinsed at least three times using nanopure water. Each pellet was resuspended in 810  $\mu\text{L}$  eFASP exchange buffer (8 M Urea, 0.10% deoxycholic acid). 90  $\mu\text{L}$  DNaseI reaction buffer and 1  $\mu\text{L}$  DNaseI was added, and the samples were incubated at 37 °C for 10 min to degrade the remaining release oligonucleotides. A volume of 450  $\mu\text{L}$  of each DNaseI treated samples was each transferred to a passivated filter unit, which was then inserted into an unpassivated tube, and centrifuged at 14,000 g at 15 °C for 10 min. The flowthrough was discarded and the rest of the sample was added into its respective filter unit and the centrifugation was repeated. A volume of 200  $\mu\text{L}$  of exchange buffer was added in each filter unit, and the samples were centrifuged at 14,000 g at 15 °C for 10 min. The flowthrough was discarded. This washing step was repeated three times. Then 200  $\mu\text{L}$  eFASP reducing buffer (8 M Urea, 20 mM dithiothreitol (DTT)) was added to each filter unit, and the samples were incubated at room temperature for 30 min. The samples were then centrifuged at 14,000 g at 15 °C for 10 min. Flowthrough was discarded again. A volume of 200  $\mu\text{L}$  eFASP alkylation buffer (8 M urea, 50 mM iodoacetamide, 50mM ammonium bicarbonate) was added to each filter unit, and the samples were incubated at room temperature in the dark for 30 min. 15  $\mu\text{L}$  DTT was added to each sample and incubated for 10 min. The samples were centrifuged again at 14,000 g at 15 °C for 10 min, and the flowthrough was discarded. 200  $\mu\text{L}$  eFASP digestion buffer (1 M urea, 50mM ammonium bicarbonate, 0.1% deoxycholic acid) was added in each filter unit, and the samples were centrifuged at 14,000 g at 15 °C for 10 min. The flowthrough was discarded. This washing step was repeated three times. The filters were transferred to passivated collection tubes. A volume of 100  $\mu\text{L}$  digestion buffer was added to each filter unit. Trypsin (0.4  $\mu\text{g}$ ) was added to capture samples, whereas 1  $\mu\text{g}$  trypsin was added to lysate control. Tubes and filter units were wrapped in Parafilm®, and incubated at 37 °C overnight with no rotation. Following digestion, the Parafilm® was removed and the tubes were centrifuged at 14,000 g at 15 °C for 10 min. A volume of 50  $\mu\text{L}$  of 50mM Ammonium Bicarbonate was added in each filter unit and centrifuged at 14,000 g at 15 °C for 10 min. This step was repeated twice. The flowthrough was transferred to new 1.7 mL low-retention tubes. A volume of 200  $\mu\text{L}$  ethyl acetate and 200  $\mu\text{L}$  1% trifluoroacetic acid (TFA) was added to the samples, and were shaken for 1 min. Samples were centrifuged at 15,800 g at 15 °C for 2 min. The top layer was removed and discarded from each tube, and another 200  $\mu\text{L}$  ethyl acetate were added, and shaken for 1 min. The samples were centrifuged again at 15,800 g at 15 °C for 2 min, and the top layer was removed. Samples were dried in a Savant SpeedVac™ Concentrator to dryness for about 150 min. Dry tube contents were dissolved in 180  $\mu\text{L}$  0.1% TFA and vortexed to mix.

### C18 Solid-Phase Extraction.

Extraction pipette tips (Agilent Technologies, A57003100K, OMIX C18 tips) were activated by pipetting 180  $\mu$ L 70% acetonitrile (ACN) up and down three times, and were washed in 0.1 TFA three times by pipetting and discarding 180  $\mu$ L of 0.1% TFA. Each sample was pipetted up and down 3 times using the washed tip. Extraction tips were then washed in 0.1% TFA as previously described. Peptides were eluted from the tip by repeated (5 $\times$ ) aspiration of a 150  $\mu$ L volume of 70% ACN with 0.1% TFA in a 600  $\mu$ L low retention tube. Eluted samples were evaporated to dryness in the SpeedVac<sup>TM</sup> for about 50 min. Tube contents were reconstituted in 95:5 H<sub>2</sub>O:ACN and 0.1% formic acid solution, 200  $\mu$ L for lysate control, and 18  $\mu$ L for capture samples. On the mass spectrometer, one technical replicate injection consisted of either 9  $\mu$ L of each sample or 2  $\mu$ L of control. Two technical replicates were performed for each sample.

### MaxQuant.

The 60 data files (in .raw) were loaded in MaxQuant (version 1.5.5.1). The two technical replicates were grouped into one experiment, resulting in 30 experiments. Spectra were searched against the *Saccharomyces cerevisiae* canonical protein database from UniProt, and a list of potential contaminants. Carbamidomethylation of cysteine was set as a fixed modification, and oxidation of methionine was set as a variable modification. First search peptide tolerance was set to 20 ppm. Main search was set to 4.5 ppm. Trypsin enzyme with 2 maximal missed cleavages was elected for the digestion mode. Match between runs function were enabled. A false discovery rate (FDR) of 1% was allowed for both peptides and proteins. The Label-Free Quantification (LFQ) algorithm was employed to assess relative quantification. Unique and razor peptides were used for quantification.

### Perseus.

The output matrix file from MaxQuant was imported into Perseus (version 1.5.6.0). Proteins from the reverse database, proteins only identified by site, as well as contaminants were filtered out. LFQ intensity values were  $\log_2(x)$  transformed. Experiments were grouped into categories of each gene capture or lysate. Protein lists were filtered to retain only the proteins with three observations in at least one group. Missing values were imputed from normal distribution (width = 0.3 standard deviations, downshift = 1.8 standard deviations) Two-sided Student's *t*-tests were performed to compare normal capture and lysate control. A permutation-based 1% FDR cutoff ( $s_0 = 2$ ) was used to select proteins with significant abundance difference. Perseus was used to prepare the protein heat map. Proteins filtered from the delta-percentile-rank analysis and their normalized average LFQ intensity for each sample and condition were made into a matrix and imported into Perseus. Values were  $\log_2(x)$  transformed and the missing values were imputed from normal distribution (width = 0.15 standard deviations, downshift = 2.5 standard deviations). Hierarchical clustering was performed on the proteins (column) with Euclidean distance. A rainbow color gradient was used to show relative abundance. Column order was arranged in two different ways to show condition difference and also locus difference (Figure 2 and SI Figure S-5).

### RAW DATA FILES.

All 60 spectra files (in .raw format) from bottom-up proteomics (4 samples + 1 control, 2 growth conditions, 3 biological replicates with 2 technical replicates each) are available on the MassIVE platform (MSV000081066, <ftp://massive.ucsd.edu/MSV000081066>).

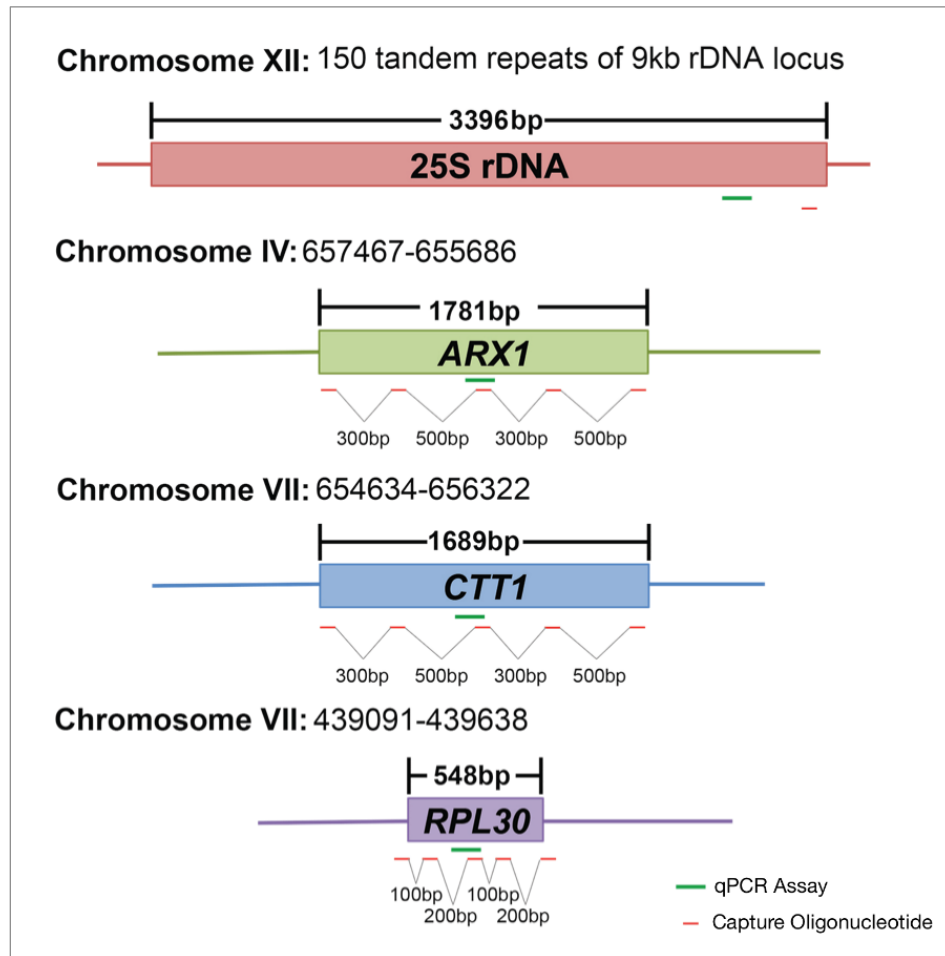

**SI Figure S-1.** Genomic sites for the capture oligonucleotides and qPCR assay in the 4 investigated loci.

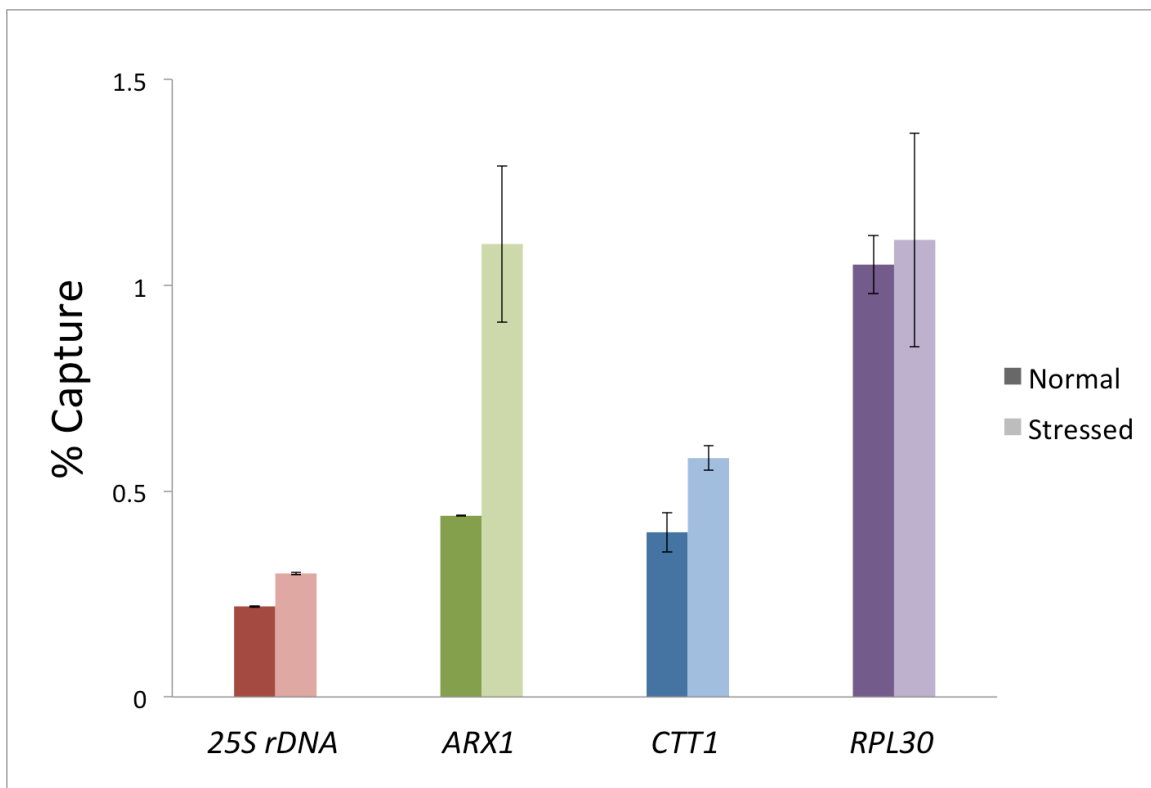

**SI Figure S-2.** Capture efficiency of the 4 targeted sequences under normal and stressed conditions, calculated from qPCR results. The error bars represent standard deviations calculated from two qPCR measurements.

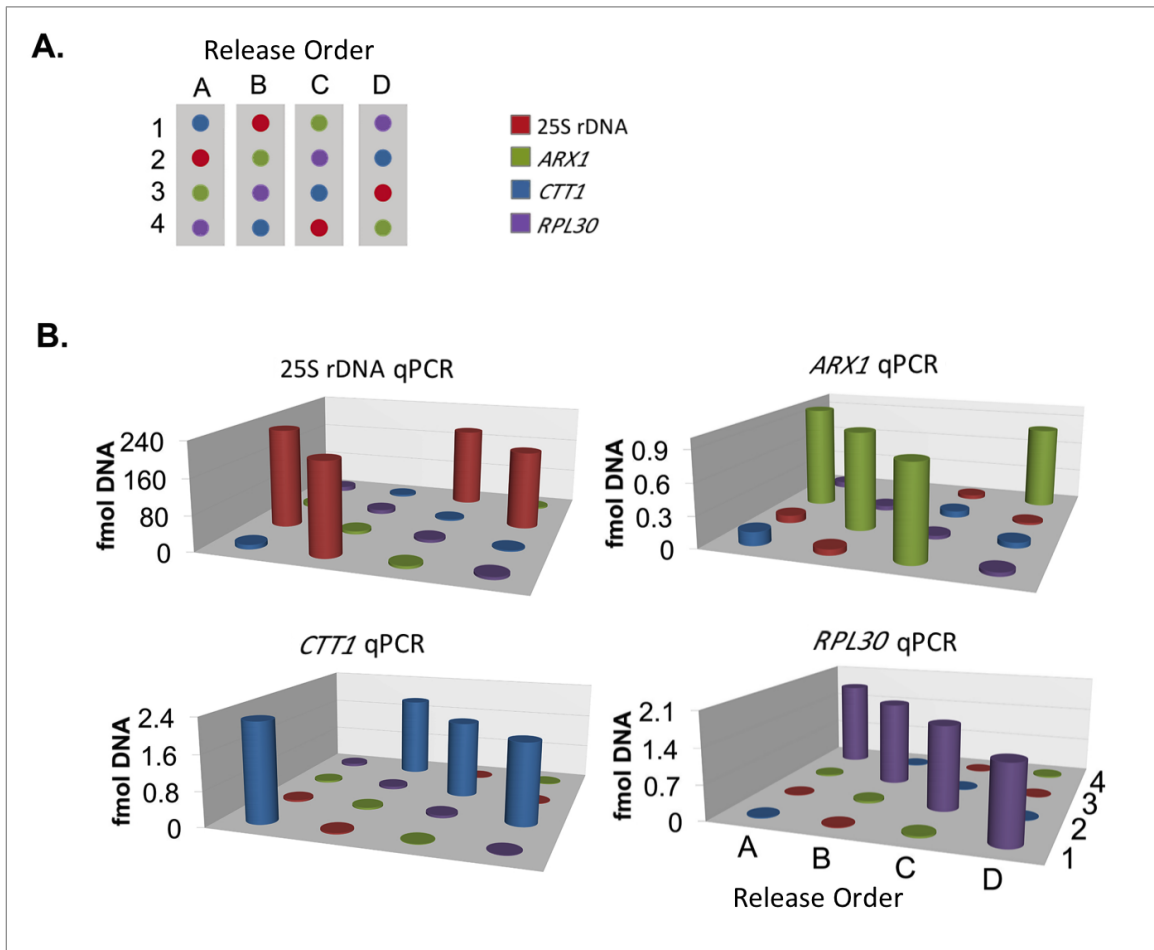

**SI Figure S-3.** Captured target and off-target sequence abundance from qPCR assays. Each set of toehold release oligonucleotides specifically releases its target at each step. Specificity was consistent regardless of adding release oligonucleotides in different orders.





**SI Table S-4. Quantitative Data of the 161 Enriched Proteins.** These were identified as enriched at one or more of the four loci. The values before “|” are the corresponding relative abundances (percentile ranks). The values after are the log<sub>2</sub>(x) transformed and normalized LFQs, which were used to generate heat maps (Figure 2, and Figure S-5). The proteins with “100 | -” were not found at the corresponding locus or condition, thus having the highest percentile rank “100”, and a missing transformed LFQ value. The missing values were imputed from normal distribution (width = 0.15, downshift = 2.5) when making the heat maps in Perseus.

| Gene Names | Normal        |               |               |               |               | Stressed      |               |               |               |               |
|------------|---------------|---------------|---------------|---------------|---------------|---------------|---------------|---------------|---------------|---------------|
|            | 25S           | ARX1          | CTT1          | RPL30         | Lysate        | 25S           | ARX1          | CTT1          | RPL30         | Lysate        |
| ADE4       | 90.16   13.59 | 70.06   15.13 | 85.38   13.73 | 100   -       | 87.49   17.01 | 100   -       | 100   -       | 100   -       | 100   -       | 100   -       |
| ADE8       | 100   -       | 100   -       | 100   -       | 100   -       | 100   -       | 100   -       | 100   -       | 94.16   14.34 | 100   -       | 100   -       |
| APA1       | 55.31   16.13 | 53.95   16.28 | 44.03   17.01 | 36.1   17.72  | 57.14   19.89 | 71.04   15.24 | 71.86   15.28 | 57.06   16.75 | 53.73   16.99 | 24.87   20.92 |
| ARC1       | 0.31   25.96  | 0.3   26      | 0.31   25.89  | 0.46   25.85  | 17.54   23.12 | 0.39   25.27  | 0.3   25.35   | 0.75   25     | 0.78   25.04  | 18.02   22.05 |
| ARC40      | 100   -       | 86.32   13.71 | 100   -       | 88.94   13.44 | 100   -       | 55.98   18.07 | 57.93   17.7  | 30.13   18.97 | 60.39   17.66 | 42.49   19    |
| ARF2       | 44.53   16.94 | 45.14   16.83 | 36.64   17.64 | 42.24   17.04 | 100   -       | 100   -       | 67.37   15.6  | 100   -       | 100   -       | 65.56   17.58 |
| AR3        | 100   -       | 100   -       | 100   -       | 100   -       | 100   -       | 100   -       | 100   -       | 92.28   14.5  | 100   -       | 100   -       |
| ARI1       | 59.69   15.77 | 43.16   16.96 | 37.42   17.52 | 50.08   16.55 | 60.99   19.66 | 50.19   16.67 | 45.66   17.07 | 77.21   15.83 | 100   -       | 36.04   19.88 |
| ARL1       | 100   -       | 100   -       | 100   -       | 100   -       | 100   -       | 100   -       | 100   -       | 100   -       | 80.2   16.16  | 100   -       |
| ATM1       | 100   -       | 100   -       | 100   -       | 100   -       | 100   -       | 100   -       | 100   -       | 100   -       | 89.41   14.71 | 100   -       |
| ATP6       | 100   -       | 100   -       | 100   -       | 100   -       | 100   -       | 65.06   17.12 | 100   -       | 100   -       | 100   -       | 100   -       |
| AUS1       | 100   -       | 100   -       | 83.81   13.96 | 100   -       | 100   -       | 100   -       | 100   -       | 100   -       | 100   -       | 100   -       |
| BDH1       | 100   -       | 100   -       | 100   -       | 81.72   14.29 | 100   -       | 100   -       | 100   -       | 93.22   13.5  | 91.76   13.77 | 100   -       |
| BGL2       | 22.19   18.84 | 30.09   18.29 | 22.33   18.82 | 29.65   18.13 | 25.71   22.16 | 8.88   21.97  | 7.78   21.77  | 5.84   22.05  | 12.94   21.43 | 13.7   22.23  |
| CCW14      | 49.38   16.53 | 53.19   16.32 | 98.74   11.98 | 68.97   15.09 | 96.26   15.68 | 26.83   19.14 | 15.42   20.49 | 15.44   20.21 | 21.37   20.31 | 100   -       |
| CDC28      | 50.16   16.58 | 59.12   15.79 | 49.53   16.57 | 49.62   16.61 | 65.71   19.29 | 69.31   16.72 | 65.87   16.81 | 83.99   14.29 | 67.25   15.96 | 39.76   19.35 |
| CDC33      | 37.19   17.7  | 34.95   17.73 | 36.48   17.63 | 36.41   17.65 | 34.09   21.4  | 34.56   18.03 | 23.5   19.79  | 44.26   17.68 | 51.57   17.3  | 33.44   20.16 |
| CFT1       | 100   -       | 6.23   21.08  | 19.34   19.15 | 26.11   18.34 | 100   -       | 20.46   19.59 | 100   -       | 100   -       | 100   -       | 100   -       |
| CIS3       | 43.75   16.81 | 54.71   16.2  | 48.27   16.6  | 56.99   15.96 | 100   -       | 100   -       | 45.81   17.37 | 100   -       | 41.76   18.33 | 100   -       |
| CIT2       | 42.97   16.96 | 39.36   17.31 | 55.35   16.14 | 42.86   17.05 | 50.64   20.27 | 100   -       | 61.68   17.26 | 100   -       | 100   -       | 33.05   19.73 |
| COP1       | 5.63   21.65  | 5.17   21.52  | 4.72   21.58  | 4.92   21.55  | 35.37   21.3  | 11.39   21.34 | 10.48   21.23 | 7.53   21.57  | 10.59   21.47 | 20.81   21.39 |
| COX2       | 100   -       | 87.69   13.55 | 100   -       | 100   -       | 100   -       | 100   -       | 100   -       | 100   -       | 100   -       | 100   -       |
| CRH1       | 24.06   18.74 | 41.64   17.03 | 40.88   17.23 | 33.64   17.84 | 100   -       | 29.54   18.78 | 25.6   19.49  | 17.33   20.03 | 37.06   18.92 | 60.24   18.2  |
| CWP1       | 6.41   21.18  | 11.09   20.07 | 7.55   20.67  | 8.76   20.41  | 100   -       | 2.51   23.34  | 2.99   22.81  | 2.45   23.37  | 4.9   22.6    | 53.32   18.73 |
| DAP1       | 72.19   15.11 | 100   -       | 75.31   14.84 | 64.21   15.7  | 77.04   18.29 | 78.19   14.86 | 76.5   14.94  | 100   -       | 100   -       | 52.26   18.79 |
| DBP3       | 61.88   15.68 | 72.34   14.97 | 55.19   16.23 | 63.59   15.62 | 61.67   19.66 | 19.5   21.51  | 48.2   18.5   | 88.51   13.94 | 36.08   19.42 | 60.84   18.14 |
| DCP2       | 100   -       | 100   -       | 100   -       | 100   -       | 100   -       | 100   -       | 91.17   13.57 | 100   -       | 100   -       | 100   -       |
| DEF1       | 100   -       | 76.29   14.67 | 100   -       | 100   -       | 100   -       | 100   -       | 100   -       | 100   -       | 100   -       | 100   -       |
| DUR1,2     | 25.31   18.69 | 34.5   17.82  | 27.67   18.39 | 28.88   18.32 | 74.78   18.45 | 55.41   16.37 | 58.83   15.84 | 61.77   16.52 | 67.84   16.1  | 57.98   17.85 |
| ECM33      | 70.94   14.92 | 59.42   15.76 | 50.16   16.55 | 48.39   16.67 | 52.02   20.25 | 42.28   17.58 | 38.92   18.58 | 23.92   19.48 | 46.47   18.37 | 50.13   19.01 |
| EMW1       | 86.09   13.92 | 100   -       | 100   -       | 100   -       | 100   -       | 100   -       | 100   -       | 100   -       | 100   -       | 68.48   16.19 |
| END3       | 65.78   15.39 | 89.36   13.45 | 56.45   16.22 | 79.11   14.51 | 78.62   18.06 | 100   -       | 100   -       | 83.43   15.24 | 88.04   14.89 | 56.65   18    |
| ENT3       | 72.81   15.09 | 16.26   19.58 | 74.37   14.92 | 31.03   18.16 | 83.74   17.63 | 46.14   18.49 | 47.46   18.37 | 81.73   14.53 | 85.69   14.33 | 18.62   20.99 |
| ERG3       | 86.88   14.08 | 100   -       | 100   -       | 77.11   14.69 | 100   -       | 100   -       | 88.02   13.96 | 100   -       | 100   -       | 76.46   16.58 |
| ERV29      | 62.81   15.72 | 100   -       | 69.18   15.36 | 75.73   14.8  | 78.72   18.11 | 100   -       | 62.72   17.39 | 52.73   17.12 | 100   -       | 42.29   18.93 |
| ETT1       | 100   -       | 77.96   14.53 | 96.86   12.46 | 100   -       | 98.13   14.73 | 100   -       | 98.8   12.04  | 98.31   13.25 | 100   -       | 31.65   19.45 |
| FCY1       | 62.5   15.58  | 85.87   13.74 | 63.52   15.62 | 75.42   14.75 | 75.86   18.35 | 100   -       | 85.78   14.16 | 100   -       | 100   -       | 59.84   17.5  |
| FOL2       | 84.06   14.28 | 100   -       | 92.3   13.35  | 90.48   13.61 | 100   -       | 100   -       | 89.07   13.79 | 100   -       | 100   -       | 100   -       |
| FPR4       | 43.91   16.84 | 47.26   16.69 | 40.09   17.18 | 50.54   16.52 | 68.87   19.12 | 100   -       | 100   -       | 100   -       | 100   -       | 57.25   18.42 |
| FRD1       | 65.31   15.38 | 92.1   13.09  | 82.23   14.28 | 60.52   15.87 | 71.53   18.76 | 80.69   14.65 | 82.19   14.43 | 68.17   16.34 | 75.88   15.94 | 26.93   20.18 |
| FRS2       | 49.53   16.62 | 48.18   16.64 | 47.33   16.79 | 46.08   16.86 | 57.93   19.83 | 76.25   15    | 50.15   18    | 83.05   15.24 | 82.16   15.39 | 26.86   20.39 |
| GAS3       | 36.72   17.68 | 56.84   15.96 | 51.73   16.35 | 58.99   15.98 | 62.76   19.57 | 59.46   16.43 | 43.56   18.32 | 34.46   18.46 | 62.35   16.61 | 43.42   19.09 |
| GCS1       | 41.56   17.14 | 45.59   16.82 | 42.61   17.06 | 44.39   16.99 | 53.89   20.07 | 75.68   15.03 | 69.31   14.65 | 66.85   15.97 | 82.35   14.64 | 47.61   18.63 |
| GFA1       | 24.69   18.73 | 28.57   18.43 | 23.74   18.81 | 22.73   18.87 | 35.07   21.32 | 32.24   19.24 | 22.46   20.48 | 35.03   18.38 | 28.43   19.46 | 11.77   22.46 |
| GLN1       | 20.78   19.02 | 22.49   18.92 | 21.86   18.93 | 19.66   19.13 | 33.89   21.42 | 43.05   17.47 | 24.25   20.14 | 36.53   18.48 | 39.41   18.29 | 23.01   20.95 |
| GLO3       | 58.28   16.01 | 67.63   15.32 | 77.52   14.5  | 65.44   15.56 | 91.43   16.54 | 100   -       | 100   -       | 100   -       | 100   -       | 87.57   15.59 |
| GPD2       | 59.84   15.82 | 61.55   15.72 | 63.36   15.63 | 51.15   16.6  | 67.29   19.19 | 58.88   16.48 | 55.24   16.57 | 78.72   14.81 | 80.39   14.79 | 34.18   20.29 |
| GPM2       | 100   -       | 100   -       | 100   -       | 100   -       | 100   -       | 100   -       | 86.98   15.39 | 100   -       | 100   -       | 100   -       |
| GSP1; GSP2 | 8.44   20.79  | 10.03   20.29 | 7.86   20.63  | 7.22   20.78  | 18.42   22.98 | 22.78   19.41 | 15.12   20.77 | 18.83   19.96 | 19.22   20.05 | 11.7   22.82  |
| HAS1       | 100   -       | 66.11   15.48 | 34.91   17.7  | 100   -       | 100   -       | 21.24   21.31 | 100   -       | 100   -       | 100   -       | 100   -       |
| HCH1       | 100   -       | 100   -       | 100   -       | 100   -       | 100   -       | 100   -       | 100   -       | 100   -       | 93.53   14.24 | 100   -       |
| HCR1       | 35.94   17.79 | 42.55   16.98 | 34.59   17.81 | 33.03   17.99 | 61.18   19.67 | 62.16   16.08 | 45.21   18.05 | 49.15   17.45 | 39.22   18.04 | 32.65   20.07 |
| HEF3       | 100   -       | 100   -       | 88.52   13.54 | 100   -       | 100   -       | 53.47   16.82 | 74.1   15.14  | 62.9   16.75  | 83.53   15.21 | 100   -       |
| HFA1       | 16.72   19.61 | 20.82   19.06 | 14.94   19.56 | 13.67   19.75 | 100   -       | 45.37   16.94 | 42.22   17.17 | 30.89   18.32 | 34.51   18.23 | 92.95   13.66 |
| HHT1       | 19.22   19.18 | 34.35   17.85 | 26.73   18.5  | 23.81   18.71 | 32.51   21.52 | 41.89   17.52 | 26.2   19.89  | 44.82   17.49 | 46.86   17.47 | 31.98   20.13 |
| HIS5       | 100   -       | 100   -       | 100   -       | 81.26   14.35 | 100   -       | 100   -       | 100   -       | 100   -       | 100   -       | 69.22   16.11 |
| HMX1       | 100   -       | 100   -       | 100   -       | 100   -       | 100   -       | 100   -       | 86.38   15.44 | 100   -       | 100   -       | 100   -       |
| HOG1       | 100   -       | 86.17   13.71 | 89.62   13.4  | 100   -       | 100   -       | 100   -       | 100   -       | 100   -       | 100   -       | 74.53   16.8  |
| HOM3       | 42.34   17.11 | 40.58   17.1  | 36.16   17.71 | 33.95   17.92 | 56.85   19.89 | 63.51   15.93 | 50   17.83    | 51.98   17.08 | 59.8   16.72  | 28.86   20.44 |
| HRR25      | 80.31   14.52 | 78.88   14.47 | 77.2   14.45  | 94.78   13.03 | 91.03   16.63 | 93.24   13.66 | 91.32   13.56 | 100   -       | 100   -       | 40.29   18.93 |
| HSP150     | 100   -       | 100   -       | 100   -       | 100   -       | 100   -       | 100   -       | 100   -       | 100   -       | 13.14   21.13 | 100   -       |
| HSP26      | 33.13   17.95 | 17.02   19.44 | 28.14   18.36 | 23.5   18.76  | 32.91   21.48 | 34.17   19.06 | 34.13   19.03 | 38.79   18.22 | 36.27   18.62 | 15.82   22.2  |
| HSP30      | 100   -       | 58.36   15.82 | 100   -       | 100   -       | 100   -       | 47.68   18.75 | 39.07   19.33 | 38.04   18.3  | 43.14   18.82 | 37.63   19.34 |
| HTA2; HTA1 | 12.5   20.02  | 16.57   19.5  | 15.72   19.51 | 18.59   19.24 | 20.2   22.8   | 9.85   22.35  | 18.56   20.31 | 22.03   19.57 | 23.53   20.3  | 17.22   22.09 |

|            |               |               |               |               |               |               |               |               |               |               |
|------------|---------------|---------------|---------------|---------------|---------------|---------------|---------------|---------------|---------------|---------------|
| IMD2       | 93.44   13.2  | 55.47   16.12 | 88.68   13.51 | 82.49   13.91 | 80.89   17.91 | 100   --      | 100   --      | 100   --      | 100   --      | 47.54   18.89 |
| LOC1       | 100   --      | 100   --      | 88.05   13.85 | 100   --      | 100   --      | 100   --      | 100   --      | 100   --      | 100   --      | 100   --      |
| LSG1       | 100   --      | 100   --      | 89.78   13.39 | 100   --      | 100   --      | 100   --      | 100   --      | 100   --      | 100   --      | 100   --      |
| MBF1       | 45.63   16.81 | 72.19   15.01 | 62.11   15.81 | 55.3   16.27  | 56.95   19.89 | 57.14   16.36 | 44.01   17.11 | 79.47   14.76 | 63.73   16.45 | 44.88   19.09 |
| MDY2       | 100   --      | 100   --      | 100   --      | 100   --      | 100   --      | 100   --      | 100   --      | 90.77   14.64 | 100   --      | 100   --      |
| MES1       | 1.72   23.49  | 1.52   23.75  | 1.57   23.78  | 1.54   23.74  | 28.08   21.92 | 2.7   23.02   | 1.5   23.35   | 2.26   23.4   | 2.75   23.22  | 15.76   21.75 |
| MET12      | 89.53   13.88 | 100   --      | 100   --      | 100   --      | 100   --      | 100   --      | 100   --      | 100   --      | 100   --      | 100   --      |
| MXR1       | 55.78   16.07 | 54.1   16.26  | 66.98   15.29 | 51   16.51    | 62.07   19.61 | 100   --      | 100   --      | 100   --      | 100   --      | 60.04   18.21 |
| MYO2       | 100   --      | 85.11   13.87 | 86.79   13.94 | 76.19   14.65 | 92.51   16.4  | 100   --      | 74.85   16.46 | 100   --      | 100   --      | 47.41   18.48 |
| MYO5; MYO3 | 100   --      | 100   --      | 100   --      | 100   --      | 100   --      | 100   --      | 94.76   13.13 | 100   --      | 100   --      | 100   --      |
| NEW1       | 31.56   18.14 | 31   18.21    | 29.4   18.26  | 24.12   18.68 | 35.76   21.26 | 63.32   15.97 | 35.03   18.92 | 41.24   17.98 | 45.88   17.57 | 18.75   21.2  |
| NIP7       | 87.81   13.77 | 100   --      | 100   --      | 100   --      | 100   --      | 100   --      | 100   --      | 100   --      | 100   --      | 100   --      |
| NOG1       | 57.19   15.96 | 100   --      | 75.94   14.47 | 67.28   15.2  | 78.13   18.17 | 96.14   13.23 | 100   --      | 100   --      | 100   --      | 74.6   16.8   |
| NOP12      | 100   --      | 100   --      | 100   --      | 100   --      | 68.97   19.09 | 100   --      | 80.09   15.91 | 100   --      | 100   --      | 100   --      |
| NOP6       | 100   --      | 100   --      | 100   --      | 78.65   14.26 | 100   --      | 100   --      | 100   --      | 100   --      | 100   --      | 100   --      |
| NUM1       | 100   --      | 56.23   16.05 | 100   --      | 100   --      | 75.37   18.39 | 63.9   15.86  | 70.51   15.39 | 82.49   15.3  | 100   --      | 70.55   17.15 |
| NUP192     | 18.75   19.29 | 19.45   19.17 | 10.85   20.06 | 5.99   21.15  | 100   --      | 100   --      | 26.8   19.04  | 100   --      | 100   --      | 100   --      |
| OLE1       | 37.97   17.61 | 36.32   17.62 | 37.89   17.56 | 45.78   16.8  | 46.4   20.54  | 39.77   17.58 | 33.23   19.01 | 55.18   17.1  | 40.39   17.94 | 36.3   19.99  |
| PAN1       | 85.31   14.24 | 100   --      | 83.49   13.87 | 80.95   14.38 | 100   --      | 100   --      | 83.23   14.34 | 100   --      | 100   --      | 100   --      |
| PAN5       | 57.5   16.01  | 100   --      | 74.53   14.78 | 86.02   13.94 | 65.22   19.32 | 100   --      | 100   --      | 91.34   13.68 | 90   13.93    | 100   --      |
| PBI2       | 36.56   17.71 | 38.15   17.42 | 39.62   17.33 | 39.78   17.39 | 65.91   19.28 | 100   --      | 57.19   17.64 | 85.12   14.2  | 95.88   13.67 | 45.21   18.65 |
| PHO88      | 52.81   16.31 | 77.05   14.61 | 66.19   15.39 | 65.9   15.42  | 68.18   19.17 | 81.08   14.63 | 79.79   14.58 | 100   --      | 100   --      | 51.53   18.87 |
| PIC2       | 61.72   15.54 | 100   --      | 74.06   14.77 | 48.08   16.66 | 100   --      | 100   --      | 100   --      | 100   --      | 100   --      | 66.69   16.34 |
| PIR1       | 15.31   19.66 | 19.91   19.13 | 19.5   19.12  | 24.42   18.61 | 100   --      | 6.37   21.69  | 4.04   22.05  | 3.77   23.07  | 7.65   21.64  | 70.08   17.19 |
| PIS1       | 100   --      | 100   --      | 100   --      | 100   --      | 100   --      | 100   --      | 63.92   17.25 | 56.31   16.84 | 65.88   17.24 | 75.13   15.6  |
| PMD1       | 15.16   19.69 | 21.43   19.02 | 21.7   18.93  | 18.43   19.25 | 100   --      | 76.83   14.99 | 100   --      | 100   --      | 100   --      | 100   --      |
| POL5       | 49.06   16.76 | 100   --      | 100   --      | 100   --      | 100   --      | 100   --      | 100   --      | 100   --      | 100   --      | 54.26   17.47 |
| PPT1       | 100   --      | 100   --      | 100   --      | 78.8   14.26  | 100   --      | 100   --      | 100   --      | 100   --      | 100   --      | 63.63   16.67 |
| PRS5       | 100   --      | 100   --      | 100   --      | 100   --      | 76.85   18.21 | 100   --      | 85.18   14.21 | 100   --      | 100   --      | 100   --      |
| PYC1       | 9.38   20.48  | 5.47   21.18  | 6.13   21.06  | 5.22   21.5   | 81.58   17.88 | 5.98   21.77  | 5.84   21.16  | 7.72   21.34  | 10.78   21.03 | 56.98   17.82 |
| PYC2       | 1.41   24.1   | 1.37   24.02  | 1.42   24.01  | 1.23   24.3   | 19.61   22.87 | 1.93   23.65  | 1.35   23.95  | 2.07   23.69  | 2.16   23.87  | 8.44   23.19  |
| RAD16      | 100   --      | 100   --      | 100   --      | 78.96   14.25 | 100   --      | 100   --      | 100   --      | 67.61   15.5  | 100   --      | 100   --      |
| RCK2       | 88.91   13.91 | 100   --      | 100   --      | 91.71   13.5  | 68.37   19.15 | 100   --      | 94.46   13.16 | 100   --      | 100   --      | 100   --      |
| RET3       | 43.13   16.95 | 100   --      | 65.72   15.31 | 46.7   16.78  | 57.24   19.88 | 100   --      | 73.5   15.17  | 62.52   16.19 | 81.96   15.42 | 100   --      |
| RIM1       | 100   --      | 100   --      | 100   --      | 100   --      | 44.24   20.72 | 53.86   18.19 | 30.99   19.96 | 10.17   21.11 | 20   21.08    | 43.88   19.37 |
| RIO1       | 100   --      | 100   --      | 100   --      | 100   --      | 100   --      | 100   --      | 82.34   13.61 | 100   --      | 100   --      | 100   --      |
| RLP7       | 78.44   14.53 | 100   --      | 100   --      | 77.57   14.66 | 100   --      | 100   --      | 100   --      | 100   --      | 100   --      | 58.98   17.13 |
| RNA1       | 45.16   16.81 | 47.42   16.67 | 45.75   16.88 | 51.77   16.46 | 74.68   18.48 | 77.61   14.91 | 57.78   17.21 | 82.67   15.3  | 64.12   16.2  | 27.79   20.11 |
| RNR1; RNR3 | 56.88   16.11 | 100   --      | 68.71   15.31 | 67.43   15.35 | 100   --      | 84.17   14.42 | 85.93   14.15 | 81.54   15.45 | 100   --      | 100   --      |
| RPA12      | 100   --      | 100   --      | 100   --      | 100   --      | 100   --      | 100   --      | 100   --      | 69.41   15.66 | 100   --      | 100   --      |
| RPA135     | 4.84   21.87  | 3.95   21.89  | 4.25   21.97  | 4.3   21.75   | 63.25   19.48 | 7.53   21.09  | 4.79   21.19  | 7.16   21.27  | 7.25   21.45  | 39.36   19.41 |
| RPA190     | 3.13   22.7   | 3.34   22.32  | 3.3   22.44   | 3.38   22.31  | 28.97   21.85 | 8.3   21.07   | 4.49   21.5   | 6.03   21.74  | 6.08   21.69  | 35.24   20.04 |
| RPA34      | 55.47   16.09 | 51.06   16.44 | 55.5   16.23  | 50.84   16.55 | 100   --      | 100   --      | 72.01   14.47 | 76.08   15.01 | 76.86   15.14 | 100   --      |
| RPA43      | 2.97   22.83  | 2.89   22.73  | 2.2   23.25   | 2.61   22.93  | 74.88   18.46 | 5.41   21.62  | 4.34   21.47  | 4.71   21.96  | 4.12   22.4   | 62.43   17.94 |
| RPA49      | 11.25   20.27 | 9.88   20.29  | 8.81   20.44  | 9.06   20.45  | 58.52   19.83 | 24.32   19.55 | 19.76   19.48 | 25.24   19.11 | 25.49   19.04 | 32.58   19.71 |
| RPB10      | 84.53   14.11 | 49.39   16.54 | 75.47   14.63 | 74.65   14.88 | 91.13   16.63 | 100   --      | 76.35   16.34 | 82.3   15.34  | 100   --      | 53.66   17.79 |
| RPB2       | 58.91   15.86 | 48.94   16.6  | 47.17   16.8  | 46.85   16.78 | 59.21   19.78 | 100   --      | 69.01   15.04 | 90.4   14.72  | 100   --      | 35.84   19.43 |
| RPB5       | 59.22   15.78 | 54.41   16.21 | 54.4   16.24  | 56.68   16.14 | 100   --      | 100   --      | 100   --      | 80.41   14.65 | 81.57   14.71 | 100   --      |
| RPC25      | 100   --      | 100   --      | 100   --      | 100   --      | 100   --      | 100   --      | 100   --      | 100   --      | 61.37   16.17 | 100   --      |
| RPL33A     | 8.91   20.65  | 28.27   18.43 | 17.92   19.32 | 21.51   18.93 | 21.87   22.58 | 100   --      | 51.65   16.53 | 65.35   16.57 | 45.69   17.56 | 18.42   22.08 |
| RPL42B;    | 26.56   18.64 | 30.4   18.24  | 33.81   17.96 | 36.87   17.65 | 66.9   19.23  | 39.38   19.38 | 77.1   14.08  | 47.65   17.29 | 100   --      | 77.39   16.53 |
| RPL43B;    | 19.06   19.3  | 20.21   19.11 | 16.35   19.5  | 26.73   18.49 | 32.02   21.56 | 58.3   16.09  | 37.87   18.89 | 61.02   16.58 | 48.43   18.15 | 55.39   18.55 |
| RPO26      | 18.28   19.33 | 27.36   18.5  | 20.28   19.1  | 18.74   19.24 | 96.65   15.59 | 35.33   17.94 | 40.27   17.33 | 39.55   17.92 | 38.04   18.04 | 76.13   16.25 |
| RPS29A     | 58.44   15.83 | 53.65   16.3  | 56.13   16.2  | 55.76   16.27 | 30.84   21.67 | 100   --      | 9.58   22.29  | 83.62   14.31 | 100   --      | 15.56   22.11 |
| RPS30B;    | 100   --      | 100   --      | 85.85   13.8  | 85.71   13.68 | 100   --      | 100   --      | 100   --      | 100   --      | 100   --      | 35.9   20.2   |
| RTT10      | 100   --      | 100   --      | 100   --      | 86.48   13.91 | 100   --      | 100   --      | 100   --      | 100   --      | 100   --      | 100   --      |
| SAC6       | 56.09   16.13 | 47.72   16.67 | 38.84   17.45 | 34.25   17.88 | 44.93   20.65 | 56.95   16.2  | 49.1   18.07  | 56.12   16.93 | 63.14   16.5  | 14.16   21.89 |
| SAM1       | 17.97   19.45 | 17.33   19.41 | 34.43   17.98 | 33.33   18.05 | 27.88   21.92 | 19.11   19.89 | 28.89   18.88 | 23.35   19.82 | 10.2   20.92  | 23.34   21.42 |
| SCW4       | 56.56   15.94 | 79.64   14.39 | 81.6   14.03  | 100   --      | 85.71   17.31 | 49.42   17.26 | 52.69   17.48 | 37.66   18.38 | 59.41   16.96 | 79.72   16.36 |
| SEC26      | 15.63   19.68 | 12.92   19.83 | 13.84   19.71 | 16.44   19.47 | 33.2   21.5   | 50.39   17.14 | 33.83   17.99 | 39.17   18.28 | 39.8   18.24  | 26.4   20.78  |
| SEC27      | 23.13   18.87 | 22.95   18.89 | 24.84   18.66 | 20.43   19.05 | 31.63   21.58 | 55.79   16.69 | 47.16   17.21 | 39.74   18.31 | 45.1   17.79  | 24.27   21.21 |
| SEC28      | 3.59   22.41  | 2.74   23.01  | 2.52   22.91  | 2.92   22.56  | 72.12   18.72 | 2.12   24.81  | 2.84   23.74  | 0.94   25     | 1.76   25.18  | 52.66   18.41 |
| SEC4       | 38.28   17.5  | 31.61   18.13 | 35.53   17.74 | 13.82   19.77 | 31.53   21.58 | 35.71   19.72 | 32.04   19.63 | 32.2   18.73  | 28.04   19.8  | 18.48   21.64 |
| SEC53      | 7.03   21.05  | 6.53   21.03  | 7.08   21.02  | 6.45   21.01  | 19.41   22.9  | 13.13   21.18 | 6.14   22.11  | 11.11   20.82 | 12.55   21.14 | 11.37   22.61 |
| SFA1       | 44.84   16.85 | 44.38   16.89 | 47.01   16.74 | 41.78   17.19 | 67   19.21    | 100   --      | 49.55   17.96 | 55.93   16.82 | 89.61   13.95 | 45.15   18.92 |
| SIN3       | 100   --      | 100   --      | 100   --      | 85.87   13.94 | 100   --      | 100   --      | 100   --      | 100   --      | 100   --      | 100   --      |
| SIZ1       | 18.59   19.25 | 29.18   18.36 | 14.31   19.68 | 16.74   19.4  | 100   --      | 60.62   16.33 | 25   20.52    | 54.8   16.59  | 77.25   15.82 | 100   --      |
| SLA2       | 80.47   14.61 | 100   --      | 88.21   13.84 | 86.18   13.93 | 100   --      | 100   --      | 100   --      | 100   --      | 100   --      | 74.27   15.66 |
| SPC110     | 88.59   13.7  | 100   --      | 100   --      | 100   --      | 100   --      | 100   --      | 100   --      | 100   --      | 100   --      | 100   --      |
| SPC42      | 68.44   15.11 | 69.3   15.18  | 69.97   15    | 72.04   14.94 | 100   --      | 93.63   13.58 | 93.71   13.25 | 100   --      | 100   --      | 100   --      |
| SRP54      | 100   --      | 100   --      | 100   --      | 87.71   13.53 | 100   --      | 100   --      | 100   --      | 100   --      | 100   --      | 100   --      |
| SSA4       | 25.94   18.56 | 66.87   15.4  | 31.6   17.98  | 41.17   17.24 | 44.53   20.67 | 100   --      | 54.49   18.04 | 100   --      | 100   --      | 48.01   19.14 |
| SUI1       | 76.25   14.92 | 43.77   16.93 | 69.03   15.07 | 100   --      | 54.88   20.03 | 100   --      | 63.32   15.96 | 66.1   16.53  | 100   --      | 100   --      |
| SUI3       | 50   16.64    | 44.83   16.83 | 46.38   16.86 | 47.47   16.74 | 74.38   18.51 | 91.89   13.79 | 81.74   14.45 | 78.53   15.23 | 77.06   15.43 | 50.93   18.27 |
| SUP35      | 19.84   19.13 | 24.01   18.76 | 20.91   19.05 | 20.58   19.07 | 43.55   20.72 | 27.99   19.99 | 31.74   18.78 | 38.98   18.28 | 40.78   18.18 | 40.36   19.4  |
| TIF4631    | 30.31   18.22 | 32.83   18.03 | 34.12   17.84 | 28.11   18.31 | 67.59   19.18 | 44.59   18.43 | 41.62   18.07 | 43.13   17.98 | 47.45   18.11 | 29.32   19.93 |
| TMA20      | 79.53   14.68 | 66.57   15.41 | 59.75   15.82 | 63.9   15.62  | 75.96   18.33 | 57.34   17.97 | 100   --      | 100   --      | 100   --      | 38.36   19.36 |
| TMA22      | 100   --      | 100   --      | 100   --      | 65.75   15.53 | 100   --      | 100   --      | 100   --      | 100   --      | 100   --      | 100   --      |
| TMA46      | 92.34   13.37 | 69.45   15.14 | 72.96   14.8  | 89.09   13.42 | 81.87   17.83 | 85.52   14.27 | 90.42   13.61 | 76.46   15.51 | 100   --      | 55.19   18.24 |

|        |               |               |               |               |               |               |               |               |               |               |
|--------|---------------|---------------|---------------|---------------|---------------|---------------|---------------|---------------|---------------|---------------|
| TOP1   | 100   --      | 100   --      | 100   --      | 100   --      | 100   --      | 46.91   16.75 | 100   --      | 100   --      | 100   --      | 100   --      |
| TPM1   | 46.09   16.79 | 52.58   16.36 | 48.9   16.69  | 40.4   17.29  | 57.83   19.85 | 59.07   16.48 | 67.81   15.59 | 49.53   17.39 | 61.76   16.59 | 32.11   20.16 |
| TPM2   | 100   --      | 100   --      | 100   --      | 100   --      | 100   --      | 100   --      | 100   --      | 100   --      | 94.12   14.03 | 100   --      |
| TRL1   | 48.44   16.59 | 63.37   15.52 | 63.68   15.43 | 50.38   16.53 | 94.78   15.94 | 100   --      | 100   --      | 100   --      | 68.63   15.7  | 100   --      |
| TRM732 | 100   --      | 100   --      | 100   --      | 100   --      | 100   --      | 78.57   14.86 | 100   --      | 100   --      | 100   --      | 100   --      |
| TUB1   | 100   --      | 91.03   13.25 | 100   --      | 80.03   14.29 | 100   --      | 96.91   13.15 | 100   --      | 100   --      | 100   --      | 100   --      |
| TUS1   | 32.03   18.01 | 43.01   16.94 | 31.29   17.99 | 27.96   18.41 | 100   --      | 51.93   18.36 | 100   --      | 100   --      | 100   --      | 100   --      |
| TY1    | 27.81   18.51 | 24.77   18.72 | 20.44   19.07 | 30.11   18.17 | 35.67   21.28 | 20.27   21.14 | 10.18   22    | 14.5   20.43  | 20.39   20.82 | 3.32   23.98  |
| URA6   | 50.31   16.57 | 47.87   16.65 | 49.37   16.61 | 50.69   16.53 | 58.23   19.83 | 84.36   14.42 | 77.69   14.81 | 71.56   16.22 | 79.8   14.85  | 36.37   19.84 |
| URA7   | 28.91   18.41 | 36.02   17.63 | 25.63   18.57 | 25.04   18.64 | 52.22   20.21 | 48.26   17.09 | 33.53   18.99 | 47.46   17.57 | 52.55   17.11 | 28.19   20.35 |
| VPS30  | 100   --      | 100   --      | 100   --      | 100   --      | 100   --      | 100   --      | 100   --      | 100   --      | 35.88   19.49 | 100   --      |
| YAR1   | 69.22   15.17 | 100   --      | 86.64   13.95 | 82.95   14.16 | 71.23   18.82 | 100   --      | 83.98   14.31 | 100   --      | 100   --      | 100   --      |
| YDJ1   | 14.38   19.82 | 12.16   19.86 | 11.32   20.16 | 9.98   20.24  | 23.15   22.43 | 23.17   20.11 | 16.77   20.51 | 19.21   19.96 | 25.29   19.61 | 14.43   22.11 |
| YPT1   | 100   --      | 100   --      | 100   --      | 63.75   15.47 | 100   --      | 100   --      | 77.99   14.78 | 85.88   15.07 | 70.39   15.55 | 33.38   20.15 |
| YRB1   | 32.66   18.01 | 32.98   18.02 | 36.32   17.66 | 32.1   18.02  | 42.36   20.79 | 41.12   17.64 | 39.97   17.53 | 46.14   17.71 | 43.73   17.96 | 34.04   20.23 |
| ZPR1   | 36.41   17.74 | 45.74   16.82 | 53.62   16.38 | 36.71   17.65 | 55.37   19.98 | 66.8   15.6   | 63.77   15.89 | 58.38   16.61 | 55.49   16.91 | 29.99   20.08 |
| ZRT1   | 100   --      | 100   --      | 100   --      | 100   --      | 100   --      | 100   --      | 100   --      | 86.25   14.64 | 100   --      | 100   --      |
| ZUO1   | 15.47   19.73 | 15.65   19.59 | 15.25   19.58 | 11.52   20.01 | 33.99   21.41 | 31.85   18.44 | 19.01   20.26 | 25.42   19.26 | 22.75   19.87 | 21.34   21.13 |

**SI Table S-5.** List of Enriched Proteins and the Corresponding Delta-Percentile-Rank. This list shows 34-88 proteins enriched at each locus under either condition (normal or stressed). The first delta-percentile-rank was from the analysis against the uncaptured lysate. The second delta-percentile-rank was calculated against other off-target capture (e.g. 25S rDNA v. the average of the other three). Proteins whose delta-percentile-rank were greater than 10% (normal conditions) or 5% (stressed conditions) were considered to be enriched.

| Normal 25S rDNA |                                               |       | Normal <i>ARX1</i> |                                               |       |
|-----------------|-----------------------------------------------|-------|--------------------|-----------------------------------------------|-------|
| Gene Name       | $\Delta$ Percentile Rank (Lysate, Other Loci) |       | Gene Name          | $\Delta$ Percentile Rank (Lysate, Other Loci) |       |
| POL5            | 50.94                                         | 50.94 | NUM1               | 19.14                                         | 43.77 |
| SCW4            | 29.15                                         | 30.52 | ENT3               | 67.48                                         | 43.14 |
| RET3            | 14.12                                         | 27.68 | CFT1               | 93.77                                         | 42.25 |
| CCW14           | 46.88                                         | 24.26 | HSP30              | 41.64                                         | 41.64 |
| NOG1            | 20.94                                         | 23.89 | SUI1               | 11.11                                         | 37.99 |
| RNR1; RNR3      | 43.13                                         | 21.84 | IMD2               | 25.42                                         | 32.73 |
| SSA4            | 18.59                                         | 20.61 | RPB10              | 41.74                                         | 28.83 |
| GAS3            | 26.04                                         | 19.13 | DEF1               | 23.71                                         | 23.71 |
| ERV29           | 15.91                                         | 18.82 | ADE4               | 17.43                                         | 21.78 |
| MBF1            | 11.32                                         | 17.57 | ETT1               | 20.16                                         | 20.99 |
| PHO88           | 15.36                                         | 16.90 | CCW14              | 43.06                                         | 19.17 |
| CRH1            | 75.94                                         | 14.66 | TMA46              | 12.42                                         | 15.34 |
| RLP7            | 21.56                                         | 14.09 | COX2               | 12.31                                         | 12.31 |
| EMW1            | 13.91                                         | 13.91 | HAS1               | 33.89                                         | 12.19 |
| RPL33A          | 12.97                                         | 13.66 | SAM1               | 10.56                                         | 11.25 |
| FCY1            | 13.36                                         | 12.44 | HSP26              | 15.89                                         | 11.24 |
| PIC2            | 38.28                                         | 12.33 | HOG1               | 13.83                                         | 10.37 |
| NIP7            | 12.19                                         | 12.19 | CWP1               | 88.91                                         |       |
| GLO3            | 33.15                                         | 11.91 | NUP192             | 80.55                                         |       |
| SPC110          | 11.41                                         | 11.41 | PIR1               | 80.09                                         |       |
| SLA2            | 19.53                                         | 10.99 | HFA1               | 79.18                                         |       |
| TRL1            | 46.34                                         | 10.71 | PMD1               | 78.57                                         |       |
| MET12           | 10.47                                         | 10.47 | PYC1               | 76.11                                         |       |
| FOL2            | 15.94                                         | 10.19 | RPA43              | 71.99                                         |       |
| CWP1            | 93.59                                         |       | SIZ1               | 70.82                                         |       |
| PMD1            | 84.84                                         |       | SEC28              | 69.38                                         |       |
| PIR1            | 84.69                                         |       | RPO26              | 69.29                                         |       |
| HFA1            | 83.28                                         |       | RPA135             | 59.30                                         |       |
| SIZ1            | 81.41                                         |       | CRH1               | 58.36                                         |       |
| NUP192          | 81.25                                         |       | TUS1               | 56.99                                         |       |
| RPO26           | 78.37                                         |       | ARF2               | 54.86                                         |       |
| PYC1            | 72.20                                         |       | RPA34              | 48.94                                         |       |
| RPA43           | 71.91                                         |       | RPA49              | 48.64                                         |       |
| SEC28           | 68.52                                         |       | RPB5               | 45.59                                         |       |
| TUS1            | 67.97                                         |       | CIS3               | 45.29                                         |       |
| RPA135          | 58.41                                         |       | DUR1, 2            | 40.28                                         |       |
| CIS3            | 56.25                                         |       | RPL42B; RPL42A     | 36.50                                         |       |
| ARF2            | 55.47                                         |       | TIF4631            | 34.76                                         |       |
| DUR1,2          | 49.47                                         |       | TRL1               | 31.40                                         |       |
| RPA49           | 47.27                                         |       | SPC42              | 30.70                                         |       |
| RPA34           | 44.53                                         |       | COP1               | 30.20                                         |       |
| RPB5            | 40.78                                         |       | SUI3               | 29.55                                         |       |
| RPL42B; RPL42A  | 40.33                                         |       | PBI2               | 27.77                                         |       |
| TIF4631         | 37.27                                         |       | RNA1               | 27.26                                         |       |
| SPC42           | 31.56                                         |       | MES1               | 26.56                                         |       |
| COP1            | 29.74                                         |       | RPA190             | 25.62                                         |       |
| RNA1            | 29.52                                         |       | GLO3               | 23.80                                         |       |

|                           |                                              |       |                            |                                              |       |
|---------------------------|----------------------------------------------|-------|----------------------------|----------------------------------------------|-------|
| PBI2                      | 29.35                                        |       | SFA1                       | 22.62                                        |       |
| MES1                      | 26.36                                        |       | FPR4                       | 21.60                                        |       |
| RPA190                    | 25.84                                        |       | SEC26                      | 20.28                                        |       |
| HCR1                      | 25.24                                        |       | SUP35                      | 19.53                                        |       |
| FPR4                      | 24.96                                        |       | HCR1                       | 18.63                                        |       |
| SUI3                      | 24.38                                        |       | ZUO1                       | 18.34                                        |       |
| SUP35                     | 23.70                                        |       | PYC2                       | 18.24                                        |       |
| URA7                      | 23.31                                        |       | ARI1                       | 17.82                                        |       |
| SFA1                      | 22.15                                        |       | ARC1                       | 17.23                                        |       |
| ZPR1                      | 18.96                                        |       | HOM3                       | 16.27                                        |       |
| ZUO1                      | 18.52                                        |       | URA7                       | 16.20                                        |       |
| PYC2                      | 18.20                                        |       | ARC40                      | 13.68                                        |       |
| SEC26                     | 17.58                                        |       | SEC53                      | 12.87                                        |       |
| ARC1                      | 17.22                                        |       | HRR25                      | 12.16                                        |       |
| CDC28                     | 15.56                                        |       | RPL43B; RPL43A             | 11.81                                        |       |
| PAN1                      | 14.69                                        |       | GLN1                       | 11.40                                        |       |
| HOM3                      | 14.50                                        |       | CIT2                       | 11.28                                        |       |
| HHT1                      | 13.29                                        |       | YDJ1                       | 10.99                                        |       |
| ERG3                      | 13.13                                        |       | TY1                        | 10.89                                        |       |
| GLN1                      | 13.11                                        |       | URA6                       | 10.35                                        |       |
| RPL43B; RPL43A            | 12.96                                        |       | RPB2                       | 10.28                                        |       |
| END3                      | 12.84                                        |       | OLE1                       | 10.08                                        |       |
| SEC53                     | 12.38                                        |       |                            |                                              |       |
| GCS1                      | 12.33                                        |       |                            |                                              |       |
| TPM1                      | 11.74                                        |       |                            |                                              |       |
| ENT3                      | 10.93                                        |       |                            |                                              |       |
| HRR25                     | 10.72                                        |       |                            |                                              |       |
| GFA1                      | 10.39                                        |       |                            |                                              |       |
| <b>Normal <i>CTT1</i></b> |                                              |       | <b>Normal <i>RPL30</i></b> |                                              |       |
| <b>Gene Name</b>          | <b>ΔPercentile Rank (Lysate, Other Loci)</b> |       | <b>Gene Name</b>           | <b>ΔPercentile Rank (Lysate, Other Loci)</b> |       |
| HAS1                      | 65.09                                        | 53.80 | YPT1                       | 36.25                                        | 36.25 |
| CFT1                      | 80.66                                        | 24.78 | TMA22                      | 34.25                                        | 34.25 |
| END3                      | 22.17                                        | 21.64 | PIC2                       | 51.92                                        | 30.51 |
| AUS1                      | 16.19                                        | 16.19 | ENT3                       | 52.71                                        | 23.45 |
| ARI1                      | 23.56                                        | 13.55 | RET3                       | 10.54                                        | 22.92 |
| SSA4                      | 12.93                                        | 13.05 | NOP6                       | 21.35                                        | 21.35 |
| LOC1                      | 11.95                                        | 11.95 | SEC4                       | 17.70                                        | 21.32 |
| HEF3                      | 11.48                                        | 11.48 | PPT1                       | 21.20                                        | 21.20 |
| FCY1                      | 12.34                                        | 11.07 | RAD16                      | 21.04                                        | 21.04 |
| TMA20                     | 16.21                                        | 10.25 | FRD1                       | 11.00                                        | 19.36 |
| LSG1                      | 10.22                                        | 10.22 | HIS5                       | 18.74                                        | 18.74 |
| CWP1                      | 92.45                                        |       | ERG3                       | 22.89                                        | 18.51 |
| NUP192                    | 89.15                                        |       | DAP1                       | 12.84                                        | 18.29 |
| SIZ1                      | 85.69                                        |       | BDH1                       | 18.28                                        | 18.28 |
| HFA1                      | 85.06                                        |       | TUB1                       | 19.97                                        | 16.98 |
| PIR1                      | 80.50                                        |       | CFT1                       | 73.89                                        | 15.74 |
| PMD1                      | 78.30                                        |       | RLP7                       | 22.43                                        | 15.24 |
| RPO26                     | 76.37                                        |       | APA1                       | 21.04                                        | 15.00 |
| PYC1                      | 75.44                                        |       | MYO2                       | 16.32                                        | 14.44 |
| RPA43                     | 72.68                                        |       | SIN3                       | 14.13                                        | 14.13 |
| SEC28                     | 69.60                                        |       | RTT10                      | 13.52                                        | 13.52 |
| TUS1                      | 68.71                                        |       | SAC6                       | 10.67                                        | 13.30 |
| ARF2                      | 63.36                                        |       | SRP54                      | 12.29                                        | 12.29 |
| CRH1                      | 59.12                                        |       | GPD2                       | 16.14                                        | 10.43 |
| RPA135                    | 59.01                                        |       | NOG1                       | 10.85                                        | 10.43 |
| CIS3                      | 51.73                                        |       | NUP192                     | 94.01                                        | 10.36 |

|                |       |  |                |       |  |
|----------------|-------|--|----------------|-------|--|
| RPA49          | 49.72 |  | CWP1           | 91.24 |  |
| DUR1, 2        | 47.11 |  | HFA1           | 86.33 |  |
| RPB5           | 45.60 |  | SIZ1           | 83.26 |  |
| RPA34          | 44.50 |  | PMD1           | 81.57 |  |
| TIF4631        | 33.47 |  | RPO26          | 77.91 |  |
| RPL42B; RPL42A | 33.09 |  | PYC1           | 76.35 |  |
| RNR1; RNR3     | 31.29 |  | PIR1           | 75.58 |  |
| TRL1           | 31.10 |  | RPA43          | 72.27 |  |
| COP1           | 30.65 |  | TUS1           | 72.04 |  |
| SPC42          | 30.03 |  | SEC28          | 69.20 |  |
| RNA1           | 28.93 |  | CRH1           | 66.36 |  |
| FPR4           | 28.77 |  | RPA135         | 58.95 |  |
| SUI3           | 28.00 |  | ARF2           | 57.76 |  |
| HCR1           | 26.59 |  | RPA49          | 49.46 |  |
| URA7           | 26.59 |  | RPA34          | 49.16 |  |
| MES1           | 26.51 |  | DUR1, 2        | 45.90 |  |
| PBI2           | 26.29 |  | TRL1           | 44.39 |  |
| PIC2           | 25.94 |  | RPB5           | 43.32 |  |
| RPA190         | 25.66 |  | CIS3           | 43.01 |  |
| SUP35          | 22.63 |  | TIF4631        | 39.48 |  |
| HOM3           | 20.68 |  | RNR1; RNR3     | 32.57 |  |
| SFA1           | 19.98 |  | COP1           | 30.45 |  |
| SEC26          | 19.37 |  | RPL42B; RPL42A | 30.03 |  |
| ZUO1           | 18.74 |  | HCR1           | 28.16 |  |
| PYC2           | 18.19 |  | SPC42          | 27.96 |  |
| ARC1           | 17.22 |  | CCW14          | 27.29 |  |
| PAN1           | 16.51 |  | URA7           | 27.18 |  |
| CDC28          | 16.19 |  | SUI3           | 26.92 |  |
| RPL43B; RPL43A | 15.67 |  | MES1           | 26.54 |  |
| RPB10          | 15.66 |  | PBI2           | 26.13 |  |
| TY1            | 15.22 |  | GLO3           | 25.99 |  |
| RPS30B; RPS30A | 14.15 |  | RPA190         | 25.59 |  |
| GLO3           | 13.91 |  | SFA1           | 25.21 |  |
| HRR25          | 13.83 |  | SUP35          | 22.96 |  |
| APA1           | 13.12 |  | RNA1           | 22.91 |  |
| SEC53          | 12.33 |  | HOM3           | 22.90 |  |
| RPB2           | 12.04 |  | ZUO1           | 22.47 |  |
| GLN1           | 12.04 |  | PAN1           | 19.05 |  |
| YDJ1           | 11.83 |  | ZPR1           | 18.66 |  |
| SLA2           | 11.79 |  | PYC2           | 18.38 |  |
| GFA1           | 11.33 |  | FPR4           | 18.33 |  |
| GCS1           | 11.28 |  | TPM1           | 17.43 |  |
| GAS3           | 11.03 |  | ARC1           | 17.08 |  |
| FRS2           | 10.60 |  | SEC26          | 16.77 |  |
| GSP1; GSP2     | 10.56 |  | RPB10          | 16.48 |  |
| HOG1           | 10.38 |  | CDC28          | 16.10 |  |
|                |       |  | RPS30B; RPS30A | 14.29 |  |
|                |       |  | GLN1           | 14.23 |  |
|                |       |  | SLA2           | 13.82 |  |
|                |       |  | YDJ1           | 13.17 |  |
|                |       |  | SEC53          | 12.96 |  |
|                |       |  | RPB2           | 12.36 |  |
|                |       |  | GFA1           | 12.34 |  |
|                |       |  | TMA20          | 12.06 |  |
|                |       |  | FRS2           | 11.85 |  |
|                |       |  | NEW1           | 11.65 |  |

|                   |                                       |       | GSP1; GSP2     | 11.20                                 |       |
|-------------------|---------------------------------------|-------|----------------|---------------------------------------|-------|
|                   |                                       |       | SEC27          | 11.20                                 |       |
|                   |                                       |       | MXR1           | 11.07                                 |       |
|                   |                                       |       | ARC40          | 11.06                                 |       |
|                   |                                       |       | ARI1           | 10.91                                 |       |
|                   |                                       |       | YRB1           | 10.26                                 |       |
| Stressed 25S rDNA |                                       |       | Stressed ARX1  |                                       |       |
| Gene Name         | ΔPercentile Rank (Lysate, Other Loci) |       | Gene Name      | ΔPercentile Rank (Lysate, Other Loci) |       |
| CFT1              | 79.54                                 | 79.54 | RPS29A         | 5.98                                  | 84.96 |
| HAS1              | 78.76                                 | 78.76 | NUP192         | 73.20                                 | 73.20 |
| TOP1              | 53.09                                 | 53.09 | SIZ1           | 75.00                                 | 39.22 |
| TUS1              | 48.07                                 | 48.07 | CIS3           | 54.19                                 | 34.78 |
| DBP3              | 41.34                                 | 38.10 | SUI1           | 36.68                                 | 25.38 |
| RPL42B; RPL42A    | 38.01                                 | 35.53 | CDC33          | 9.94                                  | 19.96 |
| ATP6              | 34.94                                 | 34.94 | NOPI2          | 19.91                                 | 19.91 |
| PMD1              | 23.17                                 | 23.17 | HHT1           | 5.78                                  | 18.33 |
| TRM732            | 21.43                                 | 21.43 | RPL43B; RPL43A | 17.51                                 | 18.04 |
| NUM1              | 6.65                                  | 20.43 | RIO1           | 17.66                                 | 17.66 |
| HEF3              | 46.53                                 | 20.04 | PAN1           | 16.77                                 | 16.77 |
| HTA2; HTA1        | 7.38                                  | 11.53 | YAR1           | 16.02                                 | 16.02 |
| SUP35             | 12.37                                 | 9.18  | PRS5           | 14.82                                 | 14.82 |
| CCW14             | 73.17                                 |       | HMX1           | 13.62                                 | 13.62 |
| PIR1              | 63.71                                 |       | GPM2           | 13.02                                 | 13.02 |
| RPA43             | 57.03                                 |       | RPA34          | 27.99                                 | 12.31 |
| PYC1              | 51.00                                 |       | FOL2           | 10.93                                 | 10.93 |
| CWP1              | 50.81                                 |       | PIS1           | 11.21                                 | 10.14 |
| SEC28             | 50.54                                 |       | DCP2           | 8.83                                  | 8.83  |
| HFA1              | 47.59                                 |       | RET3           | 26.50                                 | 7.99  |
| RPO26             | 40.80                                 |       | SEC53          | 5.23                                  | 6.12  |
| SIZ1              | 39.38                                 |       | CCW14          | 84.58                                 | 5.80  |
| RPA135            | 31.83                                 |       | RCK2           | 5.54                                  | 5.54  |
| CRH1              | 30.70                                 |       | RPA49          | 12.82                                 | 5.26  |
| SCW4              | 30.30                                 |       | MYO5; MYO3     | 5.24                                  | 5.24  |
| RPA190            | 26.94                                 |       | PIR1           | 66.04                                 |       |
| ARC1              | 17.63                                 |       | RPA43          | 58.09                                 |       |
| RNR1; RNR3        | 15.83                                 |       | PYC1           | 51.14                                 |       |
| MES1              | 13.06                                 |       | HFA1           | 50.74                                 |       |
| COP1              | 9.42                                  |       | CWP1           | 50.33                                 |       |
| RPA49             | 8.26                                  |       | SEC28          | 49.82                                 |       |
| ECM33             | 7.85                                  |       | RPO26          | 35.86                                 |       |
| PYC2              | 6.51                                  |       | CRH1           | 34.64                                 |       |
| SPC42             | 6.37                                  |       | RPA135         | 34.57                                 |       |
|                   |                                       |       | RPA190         | 30.75                                 |       |
|                   |                                       |       | SCW4           | 27.03                                 |       |
|                   |                                       |       | HEF3           | 25.90                                 |       |
|                   |                                       |       | ARC1           | 17.72                                 |       |
|                   |                                       |       | MES1           | 14.26                                 |       |
|                   |                                       |       | RNR1; RNR3     | 14.07                                 |       |
|                   |                                       |       | RIM1           | 12.89                                 |       |
|                   |                                       |       | DBP3           | 12.63                                 |       |
|                   |                                       |       | ECM33          | 11.21                                 |       |
|                   |                                       |       | COP1           | 10.33                                 |       |
|                   |                                       |       | SUP35          | 8.62                                  |       |
|                   |                                       |       | PYC2           | 7.10                                  |       |
|                   |                                       |       | SPC42          | 6.29                                  |       |
|                   |                                       |       | BGL2           | 5.91                                  |       |



| Stressed <i>CTT1</i> |                                               |       | Stressed <i>RPL30</i> |                                               |       |
|----------------------|-----------------------------------------------|-------|-----------------------|-----------------------------------------------|-------|
| Gene Name            | $\Delta$ Percentile Rank (Lysate, Other Loci) |       | Gene Name             | $\Delta$ Percentile Rank (Lysate, Other Loci) |       |
| RAD16                | 32.39                                         | 32.39 | HSP150                | 86.86                                         | 86.86 |
| ARC40                | 12.35                                         | 27.97 | VPS30                 | 64.12                                         | 64.12 |
| RIM1                 | 33.71                                         | 24.78 | CIS3                  | 58.24                                         | 40.17 |
| RPL42B; RPL42A       | 29.75                                         | 24.51 | RPC25                 | 38.63                                         | 38.63 |
| RET3                 | 37.48                                         | 22.63 | TRL1                  | 31.37                                         | 31.37 |
| SUI1                 | 33.90                                         | 21.67 | RPA12                 | 30.59                                         | 30.59 |
| GAS3                 | 8.95                                          | 20.66 | ARL1                  | 19.80                                         | 19.80 |
| PIS1                 | 18.82                                         | 20.29 | DBP3                  | 24.76                                         | 15.99 |
| ECM33                | 26.22                                         | 18.64 | SAM1                  | 13.14                                         | 13.59 |
| SCW4                 | 42.06                                         | 16.18 | RPB5                  | 18.43                                         | 11.90 |
| ZRT1                 | 13.75                                         | 13.75 | RIM1                  | 23.88                                         | 11.67 |
| RPB5                 | 19.59                                         | 13.44 | ATM1                  | 10.59                                         | 10.59 |
| CRH1                 | 42.91                                         | 13.41 | PIS1                  | 9.25                                          | 7.53  |
| HFA1                 | 62.07                                         | 9.81  | PAN5                  | 10.00                                         | 7.11  |
| MDY2                 | 9.23                                          | 9.23  | HCH1                  | 6.47                                          | 6.47  |
| RNR1; RNR3           | 18.46                                         | 8.49  | BDH1                  | 8.24                                          | 5.98  |
| ARG3                 | 7.72                                          | 7.72  | TPM2                  | 5.88                                          | 5.88  |
| HEF3                 | 37.10                                         | 7.47  | RPA34                 | 23.14                                         | 5.83  |
| RPA34                | 23.92                                         | 6.87  | CCW14                 | 78.63                                         |       |
| ADE8                 | 5.84                                          | 5.84  | PIR1                  | 62.43                                         |       |
| CCW14                | 84.56                                         | 5.77  | HFA1                  | 58.44                                         |       |
| PAN5                 | 8.66                                          | 5.33  | RPA43                 | 58.32                                         |       |
| PIR1                 | 66.31                                         |       | SEC28                 | 50.89                                         |       |
| RPA43                | 57.73                                         |       | CWP1                  | 48.42                                         |       |
| SEC28                | 51.72                                         |       | PYC1                  | 46.20                                         |       |
| CWP1                 | 50.88                                         |       | RPO26                 | 38.09                                         |       |
| PYC1                 | 49.26                                         |       | RPA135                | 32.11                                         |       |
| SIZ1                 | 45.20                                         |       | RPA190                | 29.16                                         |       |
| RPO26                | 36.58                                         |       | CRH1                  | 23.18                                         |       |
| RPA135               | 32.21                                         |       | SIZ1                  | 22.75                                         |       |
| RPA190               | 29.21                                         |       | SCW4                  | 20.31                                         |       |
| ARC1                 | 17.27                                         |       | RET3                  | 18.04                                         |       |
| MES1                 | 13.50                                         |       | ARC1                  | 17.23                                         |       |
| COP1                 | 13.28                                         |       | HEF3                  | 16.47                                         |       |
| BGL2                 | 7.86                                          |       | MES1                  | 13.01                                         |       |
| RPA49                | 7.34                                          |       | COP1                  | 10.22                                         |       |
| BDH1                 | 6.78                                          |       | RPA49                 | 7.09                                          |       |
| PYC2                 | 6.37                                          |       | RPL43B; RPL43A        | 6.95                                          |       |
|                      |                                               |       | PYC2                  | 6.29                                          |       |

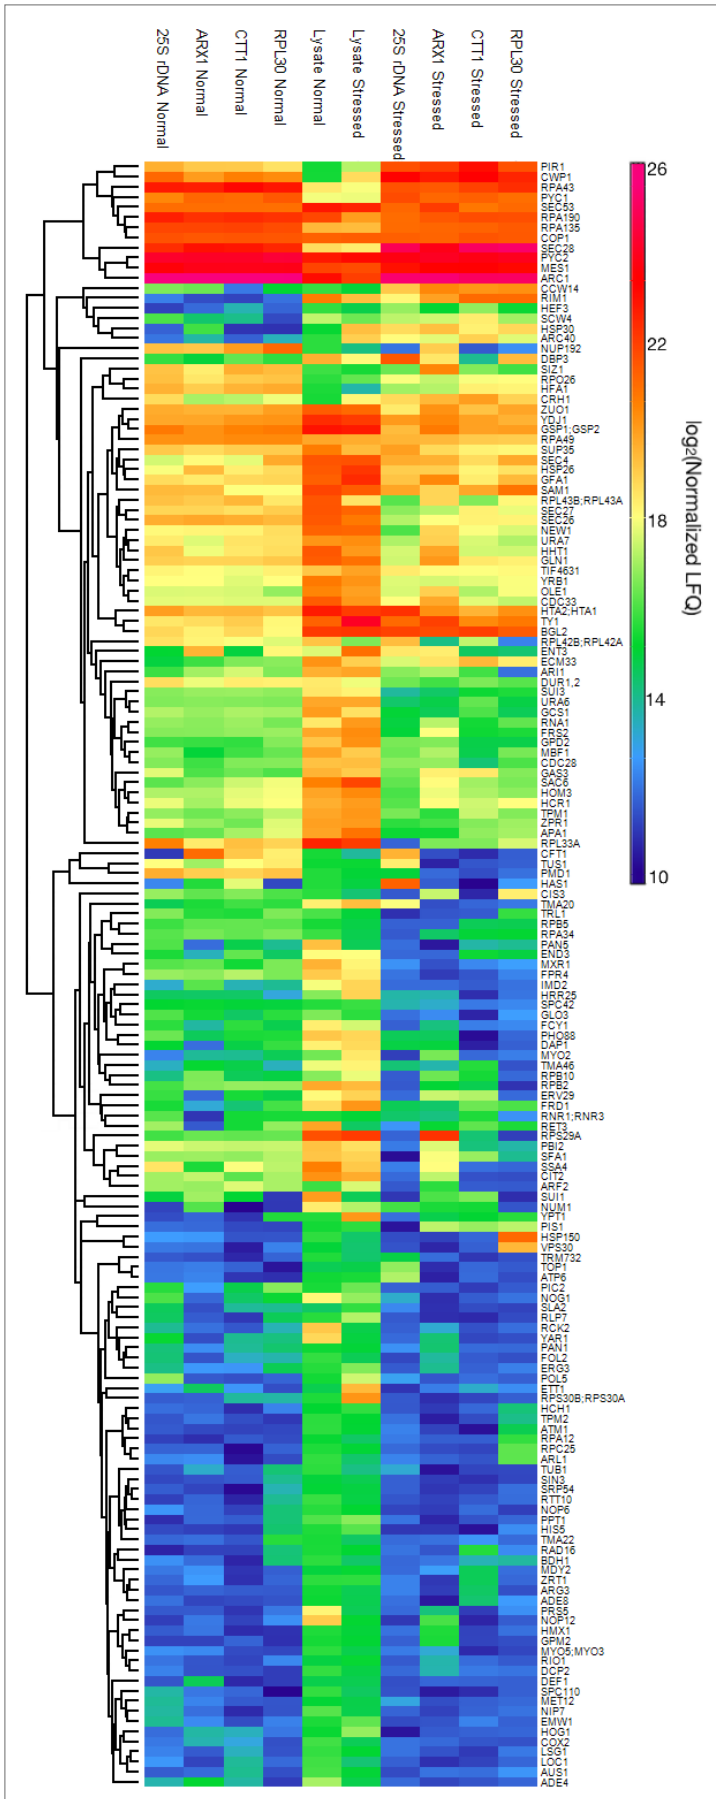

SI Figure S-5. Heat map of the 161 enriched proteins. This is the figure rearranged from Figure 2 with four capture and lysate control aligned in two conditions to show locus difference. Although many lysate proteins have higher LFQ values, their percentile ranks were lower in the list (SI Table S-4, 5).
